# Supplementary material for: Deficient Myocardial Organization and Pathological Fibrosis in Fetal Aortic Stenosis—Association of Prenatal Ultrasound with Postmortem Histology
Source: MDPI journal article supplement (doi:10.3390/jcdd8100121), 2021-09-28
Supplement: s1 [file s1]

## Supplementary data

Supplementary Figure S1. Representative images of negative controls.

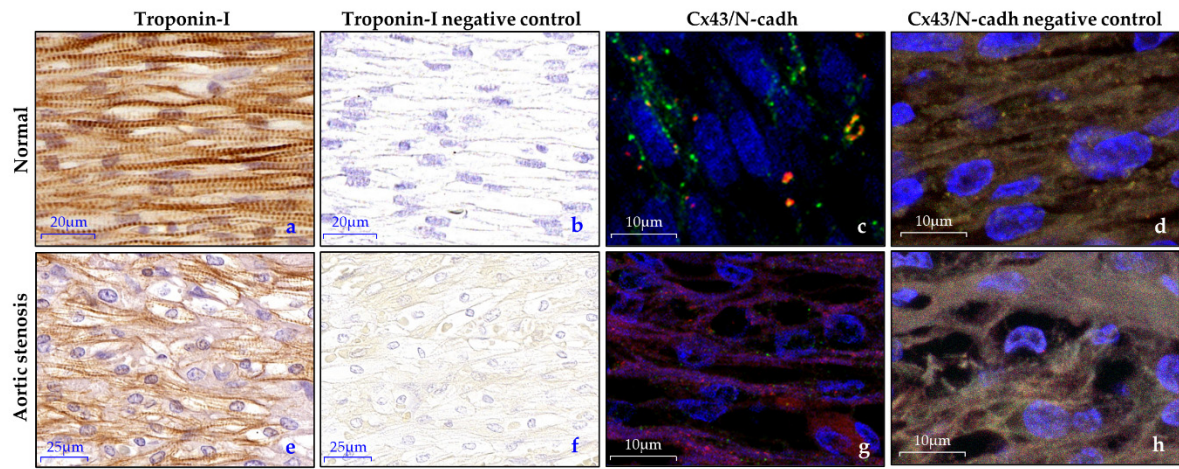

(a-d) Representative images of Troponin-I and Cx43/N-cadherin expression and their negative controls in normal hearts, and (e-h) in aortic stenosis hearts. Cx-43, Connexin-43; N-cadh, N-cadherin.
